# Supplementary material
Source: MDPI journal article supplement (https://www.mdpi.com/2079-9276/12/12/145)
Supplement: s1 [file s1]

# **Preparation of adsorbent materials from rice husk via hydrothermal carbonization: optimization of operating conditions and alkali activation**

Jhosué Naranjo<sup>a</sup>, Evelyn Juiña<sup>a</sup>, Carlos Loyo<sup>b</sup>, Michelle Romero<sup>c</sup>, Karla Vizuite<sup>d</sup>, Alexis Debut<sup>d</sup>, Sebastian Ponce<sup>a,\*</sup>, Herman A. Murillo<sup>a,\*</sup>

*<sup>a</sup>Department of Chemical Engineering, Universidad San Francisco de Quito USFQ, Diego de Robles s/n y Avenida Interoceánica, Quito 170901, Ecuador*

*<sup>b</sup>School of Chemical Sciences and Engineering, Yachay Tech University, Hda. San José s/n y Proyecto Yachay, Urcuquí 100119, Ecuador*

*<sup>c</sup>Instituto de Investigación Geológico y Energético, Quito 170518, Ecuador*

*<sup>d</sup>Centro de Nanociencia y Nanotecnología, Universidad de las Fuerzas Armadas ESPE, Sangolquí 171103, Ecuador*

\*Corresponding authors: [hmurillor@usfq.edu.ec](mailto:hmurillor@usfq.edu.ec), [sponce@usfq.edu.ec](mailto:sponce@usfq.edu.ec)

**Supplementary material**

## Diagnostic plots for HYDROCHAR MASS YIELD (MY)

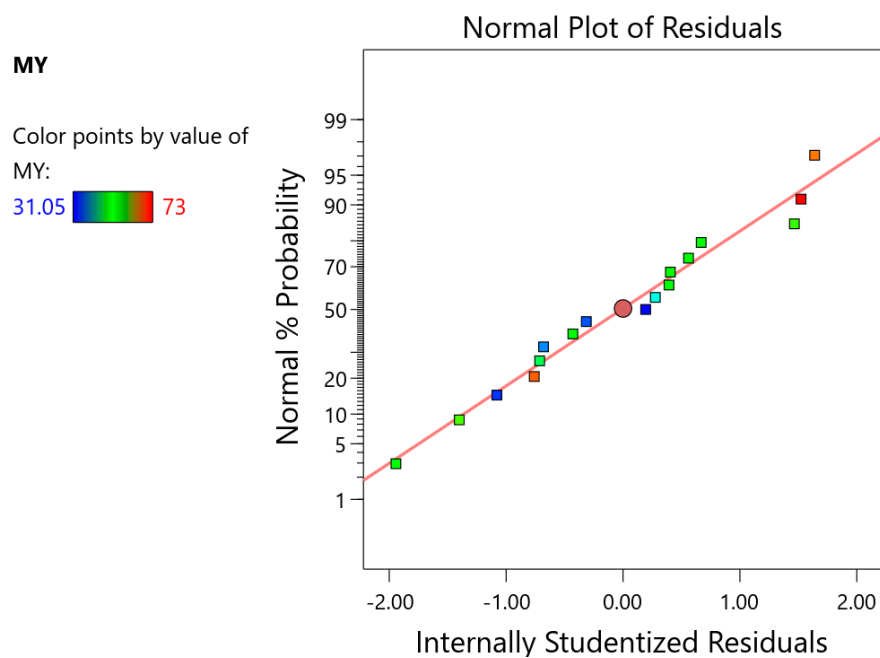

**Figure S1.** Normal plot of residuals for MY

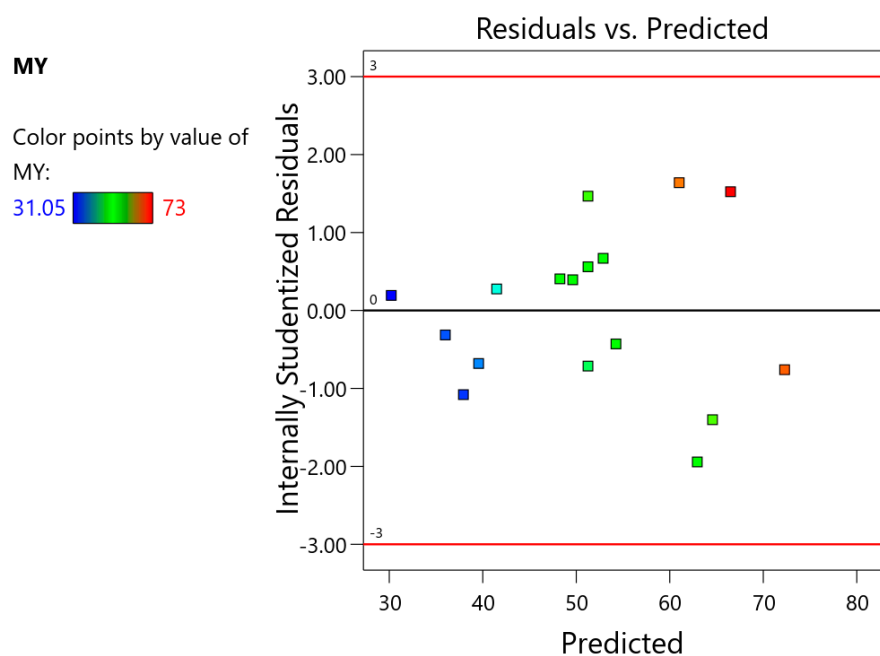

**Figure S2.** Residuals versus predicted plot for MY

## Diagnostic plots for ADSORPTION CAPACITY AT EQUILIBRIUM ( $q_e$ )

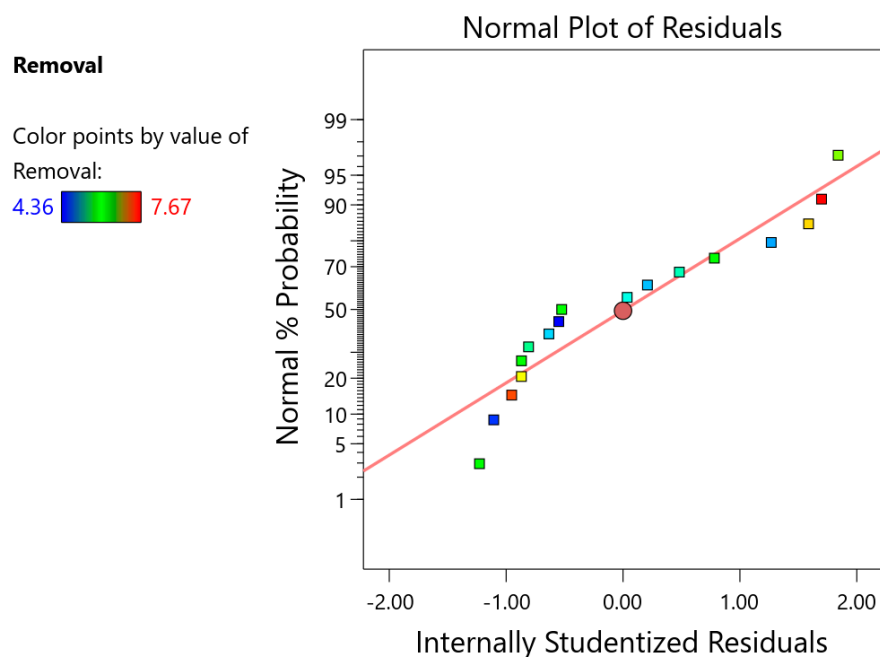

**Figure S3.** Normal plot of residuals for  $q_e$

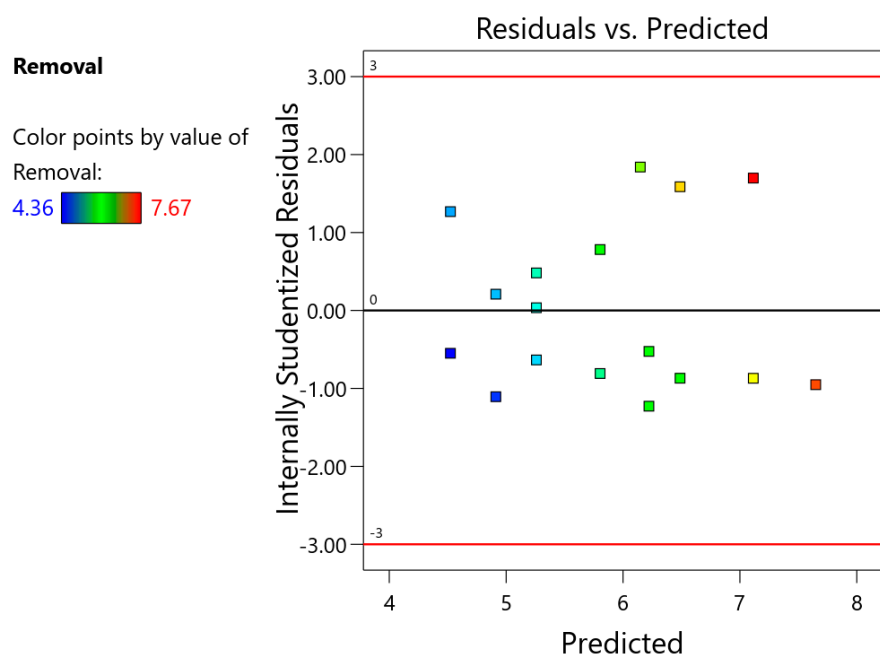

**Figure S4.** Residuals versus predicted plot for  $q_e$

### **Pictures of the reactor and raw biomass**

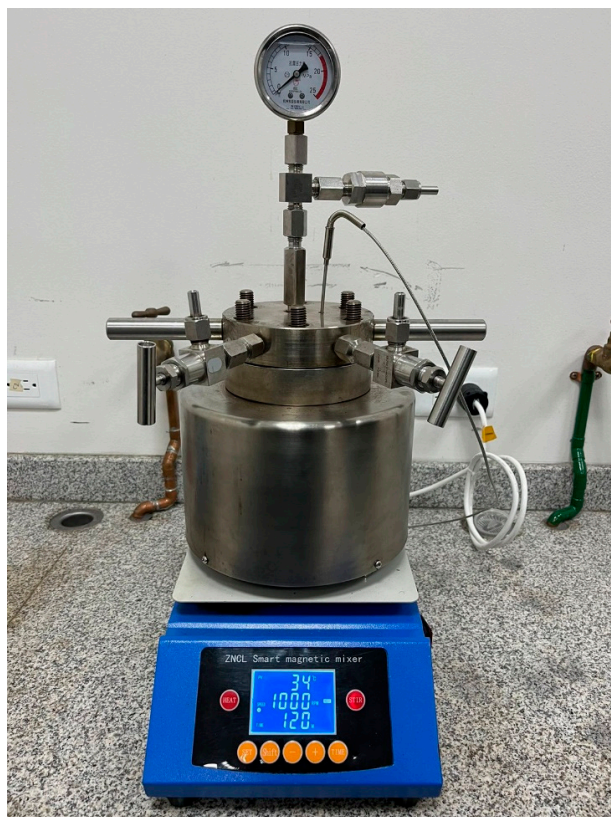

**Figure S5.** Reactor for hydrothermal carbonization experiments.

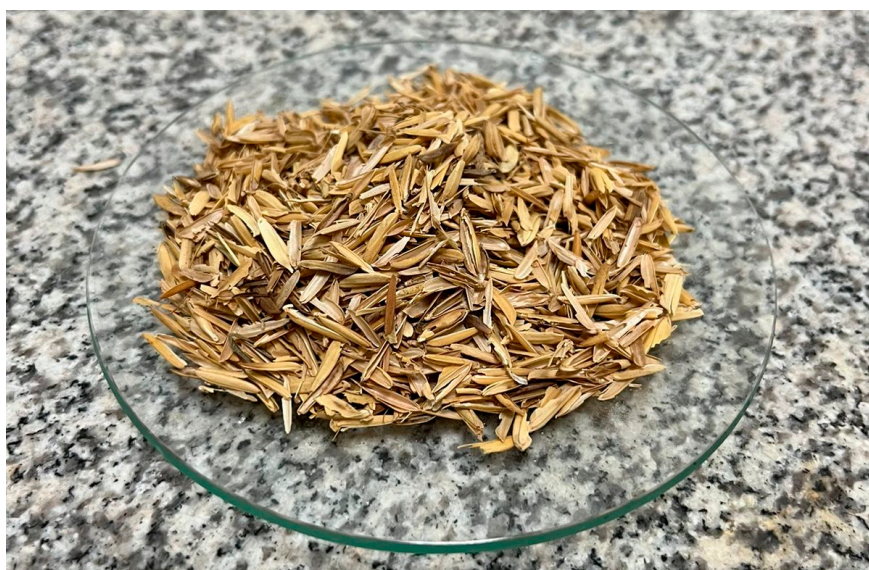

**Figure S6.** Rice husk used as raw material.

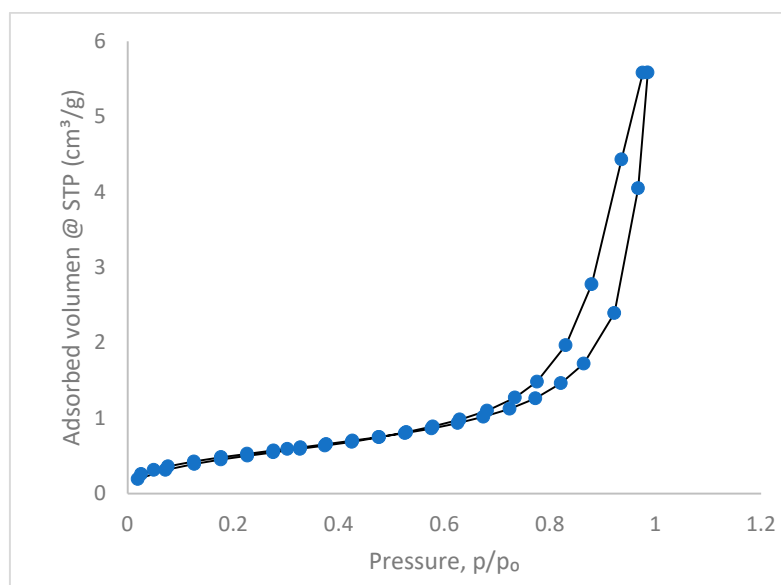

**Figure S7.** Exemplary N2 adsorption and desorption isotherm for H1.
